# Supplementary material for: Identification of the RRM1 gene family in rice (Oryza sativa) and its response to rice blast
Source: PeerJ journal article supplement (doi:10.7717/peerj.17668), 2024-07-26
Supplement: miqe_checklist.xls [file miqe_checklist.xls]

## Sheet: Sheet1
ITEM TO CHECK	IMPORTANCE	CHECKLIST
EXPERIMENTAL DESIGN
Definition of experimental and control groups	E	Experimental group: 14 day young leaf leaves of rice at12, 24, 36, and 48h after infection with blast fungus (guy11)；control group:14 day young leaves of rice before infection with blast fungus (guy11)(Line 169-179)
Number within each group	E	3(Line 169-179)
Assay carried out by core lab or investigator's lab?	D	Our own lab
Acknowledgement of authors' contributions	D
SAMPLE
Description	E	Rice(O.Sativa L.spp.japonica,var nippobare) leaves(Line 169-179)
Volume/mass of sample processed	D	500mg(Line 169-179)
Microdissection or macrodissection	E	Macrodissection
Processing procedure	E	At 0, 12, 24, 36 and 48h after infecting Magnaporthe Oryza (guy11), the young rice leaves were im-mediately frozen in liquid nitrogen and stored at -80℃ for later use(Line 169-179)
If frozen - how and how quickly?	E	immediately frozen in liquid nitrogen(Line 169-179)
If fixed - with what, how quickly?	E	No
Sample storage conditions and duration (especially for FFPE samples)	E	Store at -80℃ for a week(Line 169-179)
NUCLEIC ACID EXTRACTION
Procedure and/or instrumentation	E	The total RNA extraction kit is based on the modified guanidine isothiocyanate/phenol one-step method (SparkZol method) to lysate cells and inactivate RNase, and the total RNA is selectively adsorbed on the silicon matrix membrane in the centrifugal column under the state of high dissequence salt. Chemicalbook then removes cell metabolites, proteins and other impurities through a series of rapid …
Name of kit and details of any modifications	E	Total RNA Extraction Kit (Takara)(Line 181-194)
Source of additional reagents used	D
Details of DNase or RNAse treatment	E	RNase-Free DNase I, Add β-mercaptoethanol lysate RL(Line 181-194)
Contamination assessment (DNA or RNA)	E	Good RNA purity(Line 181-194)
Nucleic acid quantification	E	Polyacrylamide gel electrophoresis detection good(Line 181-194)
Instrument and method	E	Centrifuge, sterilization pot, Polyacrylamide gel electrophoresis, pipette gun, etc(Line 181-194)
Purity (A260/A280)	D
Yield	D
RNA integrity method/instrument	E	Polyacrylamide gel electrophoresis detection good(Line 181-194)
RIN/RQI or Cq of 3' and 5' transcripts	E	7<RIN<9(Line 181-194)
Electrophoresis traces	D
Inhibition testing (Cq dilutions, spike or other)	E	Reverse transcription of diluted samples was performed to detect the presence of PCR inhibitors(Line 181-194)
REVERSE TRANSCRIPTION
Complete reaction conditions	E	The PCR procedure is as follows: 95℃ for 2 minutes, then 35 cycles, 95℃ for 5 seconds, 60℃ for 30 seconds.(Line 181-194)
Amount of RNA and reaction volume	E	1 μg(Line 181-194)
Priming oligonucleotide (if using GSP) and concentration	E	5 nmol(Line 181-194)
Reverse transcriptase and concentration	E	TransScript RT/RI Enzyme Mix 0.2μM(Line 181-194)
Temperature and time	E	95℃ for 2 minutes, then 35 cycles, 95℃ for 5 seconds, 60℃ for 30 seconds(Line 181-194)
Manufacturer of reagents and catalogue numbers	D	AT311-02(Transgen)(Line 181-194)
Cqs with and without RT	D*
Storage conditions of cDNA	D	Store at -20℃(Line 181-194)
qPCR TARGET INFORMATION
If multiplex, efficiency and LOD of each assay.	E	LOD0.05<5.991
Sequence accession number	E	LOC_Os01g68790, LOC_Os03g25960, LOC_Os03g61990, LOC_Os12g31800(Table 1)
Location of amplicon	D
Amplicon length	E	173bp, 132bp, 152bp, 107bp(Table 1)
In silico specificity screen (BLAST, etc)	E	AXYGEN(AM-96-PCR-RD)
Pseudogenes, retropseudogenes or other homologs?	D
Sequence alignment	D
Secondary structure analysis of amplicon	D
Location of each primer by exon or intron (if applicable)	E	At least one intron is between the F primer and the R primer(Table 1)
What splice variants are targeted?	E	Respectively targeted at LOC_Os01g68790.3, LOC_Os03g25960.1, LOC_Os03g61990.3, LOC_Os12g31800.1.
qPCR OLIGONUCLEOTIDES
Primer sequences	E	RRM1-15 GGATGTGACTGAAGCTCGGGTGATC CTGGAGGTCTCTCATTCGCGAAGTTC RRM1-61 GGAGGTCTTGGAAGCCAAGGTCATC CCATCCATGTCAGCGCCATCAAG RRM1-76 CACTGAAGCAAAGGTGGTTTTTGAC GAGCTTTATCGACAGTGATCGCC RRM1-207 CTTGGATGGAAAGGATCTCGATGG CATAGCCACCGCCTCCATAG Actin CCAATCGTGAGAAGATGACCCA CCATCAGGAAGCTCGTAGCTCT(Table 1)
RTPrimerDB Identification Number	D
Probe sequences	D**
Location and identity of any modifications	E	No
Manufacturer of oligonucleotides	D
Purification method	D
qPCR PROTOCOL
Complete reaction conditions	E	The amplification procedure is as follows: initial denaturation at 95℃ for 5 minutes; 35 cycles, denatured at 95℃ for 10 seconds, annealed at 60℃ for 20 seconds; And finally extended for 20 seconds at 72℃.(Line 181-194)
Reaction volume and amount of cDNA/DNA	E	2 μl
Primer, (probe), Mg++ and dNTP concentrations	E	1 μl forward and reverse primers, 10 μl 2*SYBR green premix(contain Mg++ and dNTP)
Polymerase identity and concentration	E	The polymerase used is TAQ contained in 2*SYBR green premix
Buffer/kit identity and manufacturer	E	Takara
Exact chemical constitution of the buffer	D
Additives (SYBR Green I, DMSO, etc.)	E	SYBR green premix
Manufacturer of plates/tubes and catalog number	D
Complete thermocycling parameters	E	35 cycles, denatured at 95℃
Reaction setup (manual/robotic)	D
Manufacturer of qPCR instrument	E	Applied Biosystems
qPCR VALIDATION
Evidence of optimisation (from gradients)	D
Specificity (gel, sequence, melt, or digest)	E	Sequence specificity
For SYBR Green I, Cq of the NTC	E	23-32
Standard curves with slope and y-intercept	E	y=0.0008x2 +0.0006x
PCR efficiency calculated from slope	E	0.99997
Confidence interval for PCR efficiency or standard error	D
r2 of standard curve	E	r2>0.99
Linear dynamic range	E	about 20-30
Cq variation at lower limit	E	23
Confidence intervals throughout range	D
Evidence for limit of detection	E	LOD0.05<5.991
If multiplex, efficiency and LOD of each assay.	E	LOD0.05<5.991
DATA ANALYSIS
qPCR analysis program (source, version)	E	7500 Software v2.0.6
Cq method determination	E	Calculated by 7500 Software v2.0.6's built-in algorithm program
Outlier identification and disposition	E	Delete
Results of NTCs	E	No
Justification of number and choice of reference genes	E	3*4,Actin
Description of normalisation method	E	Z-Score Normalization: Also known as standardization, this technique transforms the data so that it has a mean of 0 and a standard deviation of 1. It subtracts the mean from each data point and then divides by the standard deviation.
Number and concordance of biological replicates	D
Number and stage (RT or qPCR) of technical replicates	E	3
Repeatability (intra-assay variation)	E	applicative
Reproducibility (inter-assay variation, %CV)	D
Power analysis	D
Statistical methods for result significance	E	ANOVA
Software (source, version)	E	GraphPad Prism 8.0.2
Cq or raw data submission using RDML	D
Table 1. MIQE checklist for authors, reviewers and editors. All essential information (E) must be submitted with the manuscript. Desirable
information (D) should be submitted if available. If using primers obtained from RTPrimerDB, information on qPCR target, oligonucleotides,
protocols and validation is available from that source.
*: Assessing the absence of DNA using a no RT assay is essential when first extracting RNA. Once the sample has been validated as
RDNA-free, inclusion of a no-RT control is desirable, but no longer essential.
**: Disclosure of the probe sequence is highly desirable and strongly encouraged. However, since not all commercial pre-designed assay
vendors provide this information, it cannot be an essential requirement. Use of such assays is advised against.
