# Supplementary material for: Identification of the RRM1 gene family in rice (Oryza sativa) and its response to rice blast
Source: PeerJ journal article supplement (doi:10.7717/peerj.17668), 2024-07-26
Supplement: Supplemental_table_1.docx [file Supplemental_table_1.docx]

| Gene | F | R |
| --- | --- | --- |
| RRM1*-15* | GCTTTCGCGAGCTCGGTACCATGGCGGCCTTCAACAAGC | CCCTTGCTCACCATGGTACCGTACTGCCCTCCATAGCCTCG |
| *RRM1-207* | CCCTTGCTCACCATGGTACCGCCCTGCTTGTTGGCATAGT | GCTTTCGCGAGCTCGGTACCATGGCGTTGGCTAATAAGATTGGTAATC |

**Supplemental table 1 Specific primers for subcellular localization of *OsRRM1* gene.**

Note: F is the forward primers, R is the reverse primers.
