# Supplementary material for: Identification of the RRM1 gene family in rice (Oryza sativa) and its response to rice blast
Source: PeerJ journal article supplement (doi:10.7717/peerj.17668), 2024-07-26
Supplement: Supplemental_table_2.xlsx [file Supplemental_table_2.xlsx]

## Sheet: Cq value
Supplemental table 2：Real-time quantitative fluorescent PCR (qRT-PCR) was used to evaluate the expression pattern of selected OsRRM1 gene after rice blast infection.
	0h(CK)			12h			24h			36h			48h
	0h-1	0h-2	0h-3	12h-1	12h-2	12h-3	24h-1	24h-2	24h-3	36h-1	36h-1	36h-1	48h-1	48h-2	48h-3
RRM1-15	31.91	31.16	31.64	29.41	28.68	29.13	29.41	29.25	29.54	29.12	28.69	29.46	28.92	29.33	28.79
RRM1-15	31.98	31.78	31.56	29.57	28.97	29.61	29.52	29.64	29.34	29.21	28.47	29.34	29.36	29.12	29.17
RRM1-15	31.95	31.68	31.49	29.32	28.94	29.45	29.31	29.91	29.87	29.02	29.08	29.15	28.91	29.06	29.51
RRM1-61	25.46	25.31	25.66	23.97	23.85	23.77	24.61	24.65	24.38	24.23	24.61	24.1	24.69	24.38	24.32
RRM1-61	25.44	25.61	25.84	23.69	23.86	23.66	24.21	24.29	24.85	24.44	24.31	24.06	24.86	24.68	24.59
RRM1-61	25.71	25.45	25.39	23.87	23.61	23.59	24.6	24.39	24.55	24.12	24.55	24.51	24.96	24.39	24.47
RRM1-76	26.55	26.98	27.1	25.54	25.42	25.31	25.32	25.34	25.4	25.62	25.41	25.55	25.89	25.87	25.87
RRM1-76	26.57	26.67	26.69	25.1	25.33	25.44	25.11	25.4	25.36	25.85	25.52	25.61	26.07	25.95	25.84
RRM1-76	26.46	26.85	26.88	25.06	25.2	25.19	24.87	25.55	25.25	25.39	25.31	25.54	26.09	25.91	25.78
RRM1-207	29.1	29.41	29.24	27.11	27.33	26.89	27.39	27.18	27.51	27.98	27.61	27.77	29.23	28.98	28.92
RRM1-207	29.01	28.92	29.16	26.98	27.06	26.85	27.33	27.26	27.31	28.45	27.54	27.61	28.34	28.85	28.94
RRM1-207	29.15	29.31	29.18	26.93	27.01	26.93	27.41	27.49	27.38	28.71	27.33	27.5	29.02	28.77	28.68
actin	23.59	23.87	23.71	23.44	23.87	23.65	23.94	23.25	23.05	23.66	23.78	23.48	23.47	23.38	23.86
actin	23.78	23.59	23.64	23.21	23.67	23.41	23.05	23.46	23.36	23.5	23.73	23.39	23.39	23.29	23.65
actin	23.51	23.91	23.65	23.46	23.38	23.64	23.23	23.26	22.97	23.36	23.64	23.46	23.33	23.21	23.4
Above are the Cq values of the four candidate OsRRM1 genes and the internal reference gene actin. Samples were collected at 0, 12, 24, 36 and 48h after infection with Rice blast fungus (guy11). The table includes three experimental replicates and three biological replicates.

## Sheet: 12h VS 0h
gene	Cq Mean(0h)	Cq Mean(12h)	ΔCq(0h)	ΔCq(12h)	ΔΔCq	2-ΔΔCq	2-ΔΔCq Mean
RRM1-15	31.57	29.0733	7.87556	5.37889	-2.49667	5.6438	5.47527
RRM1-15	31.7733	29.3833	8.07889	5.68889	-2.39	5.24157
RRM1-15	31.7067	29.2367	8.01222	5.54222	-2.47	5.54044
RRM1-61	25.4767	23.8633	1.78222	0.168889	-1.61333	3.05958	3.44056
RRM1-61	25.63	23.7367	1.93556	0.0422222	-1.89333	3.71493
RRM1-61	25.5167	23.69	1.82222	-0.00444444	-1.82667	3.54717
RRM1-76	26.8767	25.4233	3.18222	1.72889	-1.45333	2.7384	2.76104
RRM1-76	26.6433	25.29	2.94889	1.59556	-1.35333	2.55502
RRM1-76	26.73	25.15	3.03556	1.45556	-1.58	2.9897
RRM1-207	29.25	27.11	5.55556	3.41556	-2.14	4.40762	4.45855
RRM1-207	29.03	26.9633	5.33556	3.26889	-2.06667	4.18918
RRM1-207	29.2133	26.9567	5.51889	3.26222	-2.25667	4.77886
actin	23.7233	23.6533
actin	23.67	23.43
actin	23.69	23.4933
The Cq value of 12h is compared with the Cq value of 0h to calculate 2^(-ΔΔCq).

## Sheet: 24h VS 0h
gene	Cq Mean(0h)	Cq Mean(24h)	ΔCq(0h)	ΔCq(24h)	ΔΔCq	2-ΔΔCT	2-ΔΔCT Mean
RRM1-15	31.57	29.4	7.87556	5.70556	-2.17	4.50023	4.45415
RRM1-15	31.7733	29.5	8.07889	5.80556	-2.27333	4.83439
RRM1-15	31.7067	29.6967	8.01222	6.00222	-2.01	4.02782
RRM1-61	25.4767	24.5467	1.78222	0.852222	-0.93	1.90528	2.05856
RRM1-61	25.63	24.45	1.93556	0.755556	-1.18	2.26577
RRM1-61	25.5167	24.5133	1.82222	0.818889	-1.00333	2.00463
RRM1-76	26.8767	25.3533	3.18222	1.65889	-1.52333	2.87454	2.75703
RRM1-76	26.6433	25.29	2.94889	1.59556	-1.35333	2.55502
RRM1-76	26.73	25.2233	3.03556	1.52889	-1.50667	2.84153
RRM1-207	29.25	27.36	5.55556	3.66556	-1.89	3.70635	3.49127
RRM1-207	29.03	27.3	5.33556	3.60556	-1.73	3.31728
RRM1-207	29.2133	27.4267	5.51889	3.73222	-1.78667	3.45017
actin	23.7233	23.4133
actin	23.67	23.29
actin	23.69	23.1533
The Cq value of 24h is compared with the Cq value of 0h to calculate 2^(-ΔΔCq).

## Sheet: 36h VS 0h
gene	Cq Mean(0h)	Cq Mean(36h)	ΔCq(0h)	ΔCq(36h)	ΔΔCq	2-ΔΔCT	2-ΔΔCT Mean
RRM1-15	31.57	29.09	7.87556	5.39556	-2.48	5.57897	6.18201
RRM1-15	31.7733	29.0067	8.07889	5.31222	-2.76667	6.80534
RRM1-15	31.7067	29.0833	8.01222	5.38889	-2.62333	6.16172
RRM1-61	25.4767	24.3133	1.78222	0.618889	-1.16333	2.23974	2.32836
RRM1-61	25.63	24.27	1.93556	0.575556	-1.36	2.56685
RRM1-61	25.5167	24.3933	1.82222	0.698889	-1.12333	2.1785
RRM1-76	26.8767	25.5267	3.18222	1.83222	-1.35	2.54912	2.33902
RRM1-76	26.6433	25.66	2.94889	1.96556	-0.983333	1.97703
RRM1-76	26.73	25.4133	3.03556	1.71889	-1.31667	2.4909
RRM1-207	29.25	27.7867	5.55556	4.09222	-1.46333	2.75745	2.52531
RRM1-207	29.03	27.8667	5.33556	4.17222	-1.16333	2.23974
RRM1-207	29.2133	27.8467	5.51889	4.15222	-1.36667	2.57874
actin	23.7233	23.64
actin	23.67	23.54
actin	23.69	23.4867
The Cq value of 24h is compared with the Cq value of 0h to calculate 2^(-ΔΔCq).

## Sheet: 48h VS 0h
gene	Cq Mean(0h)	Cq Mean(48h)	ΔCq(0h)	ΔCq(48h)	ΔΔCq	2-ΔΔCT	2-ΔΔCT Mean
RRM1-15	31.57	29.0133	7.87556	5.31889	-2.55667	5.88347	5.86992
RRM1-15	31.7733	29.2167	8.07889	5.52222	-2.55667	5.88347
RRM1-15	31.7067	29.16	8.01222	5.46556	-2.54667	5.84283
RRM1-61	25.4767	24.4633	1.78222	0.768889	-1.01333	2.01857	1.92991
RRM1-61	25.63	24.71	1.93556	1.01556	-0.92	1.89212
RRM1-61	25.5167	24.6067	1.82222	0.912222	-0.91	1.87905
RRM1-76	26.8767	25.8767	3.18222	2.18222	-1	2	1.78614
RRM1-76	26.6433	25.9533	2.94889	2.25889	-0.69	1.61328
RRM1-76	26.73	25.9267	3.03556	2.23222	-0.803333	1.74513
RRM1-207	29.25	29.0433	5.55556	5.34889	-0.206667	1.15402	1.23758
RRM1-207	29.03	28.71	5.33556	5.01556	-0.32	1.24833
RRM1-207	29.2133	28.8233	5.51889	5.12889	-0.39	1.31039
actin	23.7233	23.57
actin	23.67	23.4433
actin	23.69	23.3133
The Cq value of 24h is compared with the Cq value of 0h to calculate 2^(-ΔΔCq).

## Sheet: RAW
The relative expression of selected OsRRM1 gene was detected by qRT-PCR after infection with rice blast fungus.
gene	0h			12h			24h			36h			48h
RRM1-15	1.08	0.94	0.99	5.64	5.24	5.54	4.5	4.83	4.03	5.58	6.81	6.16	5.88	5.88	5.84
RRM1-61	1.04729	0.937354	1.01866	3.06	3.71	3.55	1.91	2.27	2	2.24	2.57	2.18	2.02	1.89	1.88
RRM1-76	0.918064	1.07674	1.01162	2.74	2.56	2.99	2.87	2.56	2.84	2.55	1.98	2.49	2	1.61	1.75
RRM1-207	0.941696	1.09682	0.968171	4.41	4.19	4.78	3.71	3.32	3.45	2.76	2.24	2.58	1.15402	1.24833	1.31039
